# Supplementary material
Source: publisher figshare collection journal article supplement (https://acs.figshare.com/ndownloader/files/22121052)
Supplement: Supplementary file 1 [file 22121052]

# Phenolic compounds from *Morus nigra* regulate viability and apoptosis of pancreatic $\beta$ -cells possibly via SERCA activity

Vladimir Heger<sup>a,b</sup>, Barbora Benesova<sup>a,b</sup>, Jana Viskupicova<sup>a</sup>, Magdalena Majekova<sup>a</sup>, Zoofishan Zoofishan<sup>c</sup>, Attila Hunyadi<sup>c</sup>, **Lubica Horakova**<sup>a\*</sup>

**Corresponding author**, e-mail address Lubica.Horakova@savba.sk

<sup>a</sup> Institute of Experimental Pharmacology and Toxicology, Centre of Experimental Medicine SAS, Dubravska cesta 9, 841 01 Bratislava, Slovakia

<sup>b</sup> Department of Biochemistry, Faculty of Natural Sciences, Comenius University in Bratislava, Mlynska dolina, Ilkovicova 6, 842 15 Bratislava 4, Slovakia

<sup>c</sup> Institute of Pharmacognosy, Interdisciplinary Excellence Centre, University of Szeged, Eötvös u. 6, 6720, Szeged, Hungary

## Supporting Information:

### Details of Experimental Procedures

#### SERCA activity measurement

SR vesicles (1 mg prot./ml) were added to the assay mixture (40 mM HEPES pH 7.2, 0.1 M KCl, 5.1 mM MgSO<sub>4</sub>, 2.1 mM ATP, 0.52 mM phosphoenolpyruvate, 1 mM EGTA, 0.15 mM NADH, 7.5 IU of pyruvate kinase, 18 IU of lactate dehydrogenase) and incubated for 2 minutes with phenolic compounds (10-70  $\mu$ M) at 37 °C, pH 7.2. The reaction was started by addition of 1 mM CaCl<sub>2</sub> to the reaction mixture. The absorbance was recorded at 340 nm with a microplate reader (Infinite M200, Tecan, Switzerland).

#### Labeling of SERCA1 in SR vesicles using FITC

After incubation with compounds, FITC-ATPase labeling ratio of approximately 0.5:1.0 was performed. Stock solution of FITC (6 mM) was prepared in dry dimethylformamide. SR (0.6 mg protein/ml) was diluted in the volume of 35  $\mu$ l of a HEPES buffer (1M KCl, 0.25 M sucrose and 50 mM HEPES, pH 8.0). The final reaction mixture contained 2.5  $\eta$ M of FITC. The reaction mixture was left to stand at room temperature in dark for 1 h and consequently diluted with 250  $\mu$ l of a Tris-buffer (0.2 M sucrose, 50 mM Tris-HCl, pH 7.0). Labeled samples were left to stand for 30 min at 37 °C and stored on ice until detection. Labeled protein (15  $\mu$ g) was added

to 1ml of Tris-buffer (5 mM MgSO<sub>4</sub>, 100 mM KCl, 25  $\mu$ M EGTA and 50 mM Tris–maleate buffer, pH 7.0, 25°C).

### **Culturing of beta-cells**

INS-1E insulinoma pancreatic beta-cell line (kindly provided by Prof. Claes Wollheim, University of Geneva) was cultured in RPMI 1640 (11 mM glucose, Sigma Aldrich). RPMI 1640 was supplemented with 100 U/ml penicillin, 100  $\mu$ g/ml streptomycin, 2 mM L-glutamine, 1 mM Na-pyruvate, 55  $\mu$ M 2-mercaptoethanol, 10 mM HEPES, 1% non-essential amino acids, and 10% fetal bovine serum, pH 7.0-7.4. The cells were grown in a humidified incubator containing 5% CO<sub>2</sub> at 37 °C. Lysis buffer contained 0.2 ml per 1x10<sup>6</sup> cells/25 cm<sup>2</sup> flask containing 20 mM Tris-HCl, 150 mM NaCl, 1 mM Na<sub>2</sub>EDTA, 1 mM EGTA, 1% Triton, 2.5 mM sodium pyrophosphate, 1 mM  $\beta$ -glycerophosphate, 1 mM Na<sub>3</sub>VO<sub>4</sub> and 1  $\mu$ g/ml leupeptin. Cells were incubated with the IC<sub>50</sub> concentrations of individual compounds for 24 h and then submitted to lysis in ice-cold lysis buffer. The cells were homogenized by passing the lysate through a syringe needle. The lysates were kept on ice for 10 min and then centrifuged for 10 min at 20 160 RCF and kept at -30 °C until further use.

### **Separation of proteins**

Laemmli buffer (25mM Tris, 1% SDS, 0.192M glycine, 1% bromphenol blue, pH 6.8) containing freshly added 5% mercaptoethanol was added to the protein samples. The samples were loaded onto an SDS–polyacrylamide gel (10% separating, 4% stacking gel). The separation was performed for 0.5 h at 50 V and then 1.5 h at 150 V. After SDS-PAGE, the proteins were transferred to immobilon-P polyvinylidene fluoride (PVDF) membrane by semidry immunoblotting (250 mA for 30 min). All incubations were performed in PBS, 0.1% Tween. The membrane with transferred proteins was blocked with 5% fat-free dry milk for 2 h and then exposed to the monoclonal mouse IgG antibody against SERCA2 (IID8, AB 630230, sc-53010, Santa Cruz, USA 1:1 000 in 2.5%, fat-free dry milk). All membranes were incubated with mouse anti- $\beta$ -actin monoclonal antibody (AB 2714189, sc-47778, Santa Cruz, USA, 1:10 000). Goat anti-mouse IgG-HRP (AB631736, sc-2005, Santa Cruz, USA 1:10 000 in 2.5%, fat-free dry milk) was used as a secondary antibody for both SERCA2b and  $\beta$ -actin. The bands were visualized using luminol (sc-2048, Santa Cruz, USA) as a chemiluminescent probe and analyzed by Amersham Imager 600 (GE Health Care Europe GmbH, Freiburg, Germany).

### **Cytotoxicity assay (MTT)**

INS-1E cells were seeded in 96-microwell plates at a density of  $5 \times 10^4$  cells per well. The cells were pre-incubated for 24 h with or without different concentrations of individual phenolic compounds (1-200  $\mu$ M), 5% CO<sub>2</sub>, at 37 °C. MTT was added to achieve the final concentration of 0.5 mg/ml and after incubation over a period of 4 h, solubilization buffer (10% SDS in 0.01 M HCl) was added and let to stand for 15-17 h to solubilize the formazan formed.

### **Detection of apoptosis**

INS-1E cells were harvested and resuspended in cold Krebs-Ringer Bicarbonate Buffer (KRBH) comprised of 140 mM NaCl, 3.6 mM KCl, 0.5 mM NaH<sub>2</sub>PO<sub>4</sub>, 0.5 mM MgSO<sub>4</sub>, 1.5 mM CaCl<sub>2</sub>, 2 mM NaHCO<sub>3</sub>, 10 mM HEPES, and 0.1% (w/v) bovine serum albumin. The cells were counted and the cell suspension was adjusted to  $1 \times 10^6$  cells/ml with KRBH buffer. FITC Annexin (5  $\mu$ l) and propidium iodide (2  $\mu$ l of the 100  $\mu$ g/ml PI stock solution) were added to each 100  $\mu$ l sample cell suspension and the cells were incubated for 15 min in the dark. Finally, 400  $\mu$ l of KRBH were added and the stained cells were analyzed by flow cytometry (Beckman Coulter, USA) using FL1 and FL3 channels. A total of 5000-gated events were analyzed per sample by flow cytometry.

### **Release of insulin**

The secretory responses to glucose were measured in INS-1E cells, after 24 h-preincubation of beta-cells with individual compounds the cells were washed with glucose free KRBH buffer. Next, they were incubated for 30 min at 37 °C in glucose free KRBH buffer and then for 30 min at 37 °C in KRBH buffer supplemented with 16.7 mM glucose. After incubations, the supernatants were collected for insulin secretion, detected by RIA kit (Mercodia, Sweden) using rat insulin as standard.
